# Supplementary material for: Vesicular release probability sets the strength of individual Schaffer collateral synapses
Source: Springer Nature journal article supplement (doi:10.1038/s41467-022-33565-6), 2022-10-17
Supplement: MOESM1 [file 41467_2022_33565_MOESM1_ESM.pdf]

## Supplementary Information

for

### **Vesicular release probability sets the strength of individual Schaffer collateral synapses**

Céline D. Dürst, J. Simon Wiegert, Christian Schulze, Nordine Helassa, Katalin Török and Thomas G. Oertner

#### **Inventory**

Supplementary Figure 1: Temporal stability of iGluSnFR transients.

Supplementary Figure 2: Measured release probabilities are independent of imaging noise.

Supplementary Figure 3: Two sigma threshold to discriminate successes from failures.

Supplementary Figure 4: Multisynaptic boutons show a second release site under high  $p_r$ .

Supplementary Figure 5: Low occupancy of AMPARs.

Supplementary Figure 6: Unchanged synaptic release probability upon block of NMDAR.

Supplementary Figure 7: Expression of iGluSnFR does not affect synaptic transmission.

Supplementary Figure 8: Histogram bin size effects.

Supplementary Figure 9: Extracted parameters are robust to assumed saturation value.

Supplementary Figure 10: Correlation matrix of extracted quantal parameters.

Supplementary Figure 11: Extracting iGluSnFR kinetics from synaptic imaging data.

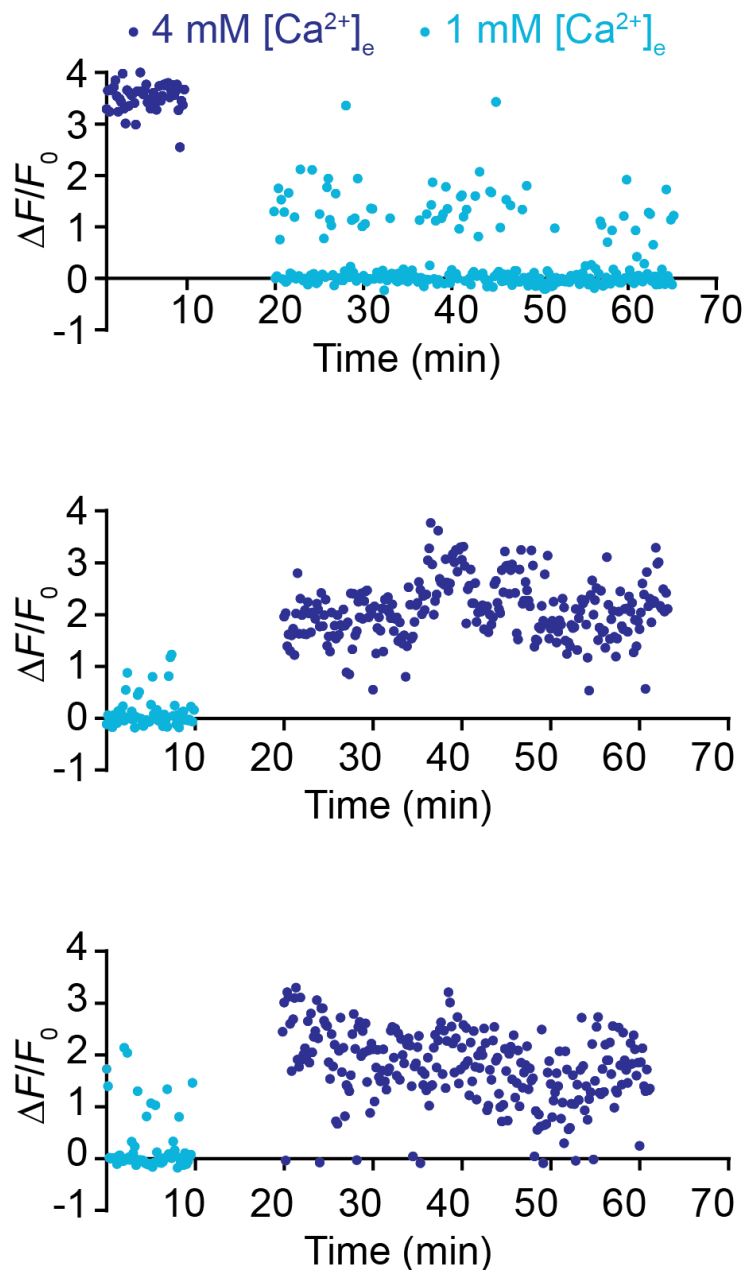

**Supplementary Figure 1: Temporal stability of iGluSnFR transients.**

Response amplitude in response to single presynaptic APs monitored in ACSF containing 1 and 4 mM  $[Ca^{2+}]_e$  at 33°C. During the wash-in period (10 min) from 1 to 4 mM  $[Ca^{2+}]_e$  or vice versa, no images were acquired. Three different Schaffer collateral boutons from 3 different organotypic cultures. Source data are provided as a Source Data file.

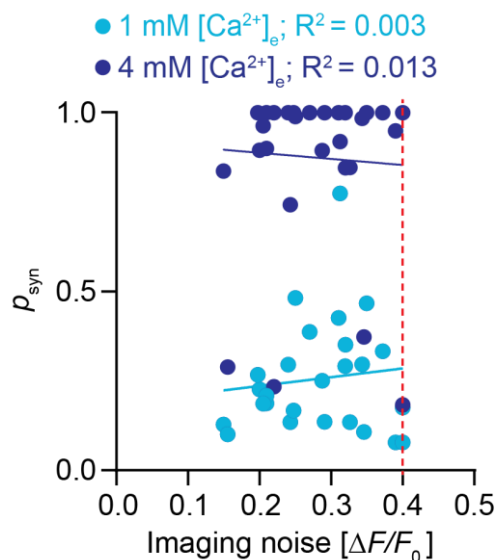

**Supplementary Figure 2: Estimated release probabilities were independent of imaging noise.**  $p_{syn}$  plotted as a function of the imaging noise. The imaging noise corresponds to the full width at half maximum (FWHM) of a Gaussian fit to the distribution of the baseline noise from trial to trial for a given boutons. Experiments with an imaging noise above a FWHM of 0.4  $\Delta F/F_0$  (red dotted line) were discarded. Source data are provided as a Source Data file.

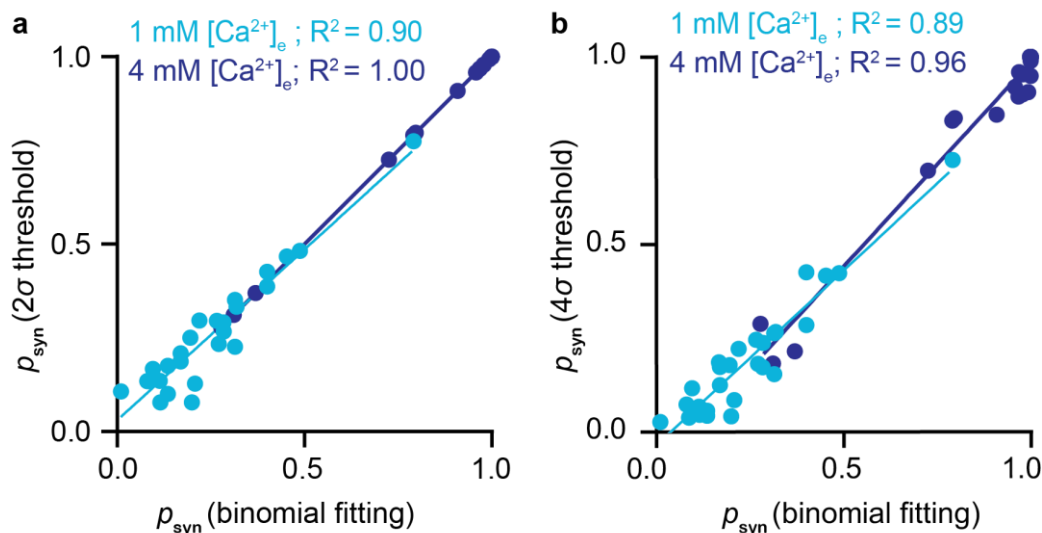

**Supplementary Figure 3: Two sigma threshold to discriminate successes from failures delivers  $p_{syn}$  values consistent with full quantal analysis.**

**a)** Synaptic release probability ( $p_{syn}$ ) measured as the number of successes (responses exceeding  $2\sigma$  of baseline fluorescence fluctuations) divided by the number of trials, plotted as a function of  $p_{syn}$  calculated from the quantal parameters extracted with the binomial fitting procedure ( $p_{syn} = 1 - (1 - p_{ves})^M$ ) (Equation 5). Linear fits show high correlation between the two estimates of  $p_{syn}$ . **b)** Same as **a**, but classified with a higher threshold ( $4\sigma$ ). The resulting estimates of  $p_{syn}$  are generally lower

and not as consistent with our binomial quantal analysis. Source data are provided as a Source Data file.

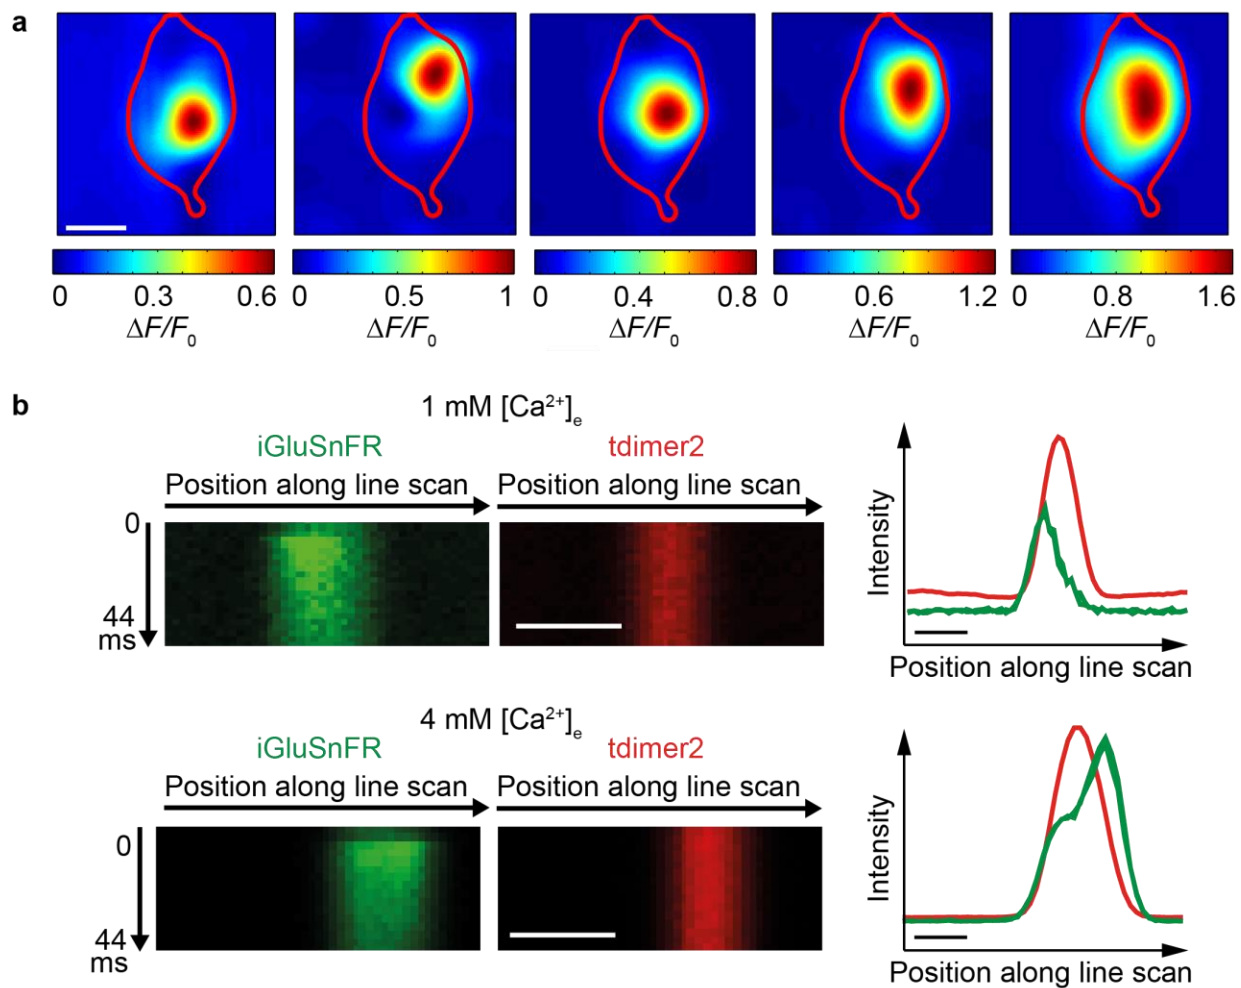

**Supplementary Figure 4: Multisynaptic boutons show a second release site under high release probability conditions. a)** Example of color-coded iGluSnFR signal of a multi-synapse bouton. Each frame represents the iGluSnFR signal in response to a single action potential. Scale bar, 1  $\mu\text{m}$ . **b)** Example of the average intensity profile (average of  $\sim 30$  trials) *post hoc* aligned on the red morphological marker of a straight-line scan across a multisynaptic bouton in 1 mM  $[Ca^{2+}]_e$  (upper panel) with a single hot spot and in 4 mM  $[Ca^{2+}]_e$  (lower panel) with the appearance of a second hot spot. Boutons with multiple release sites were rare; we excluded them from further analysis. Scale bar, 1  $\mu\text{m}$ .

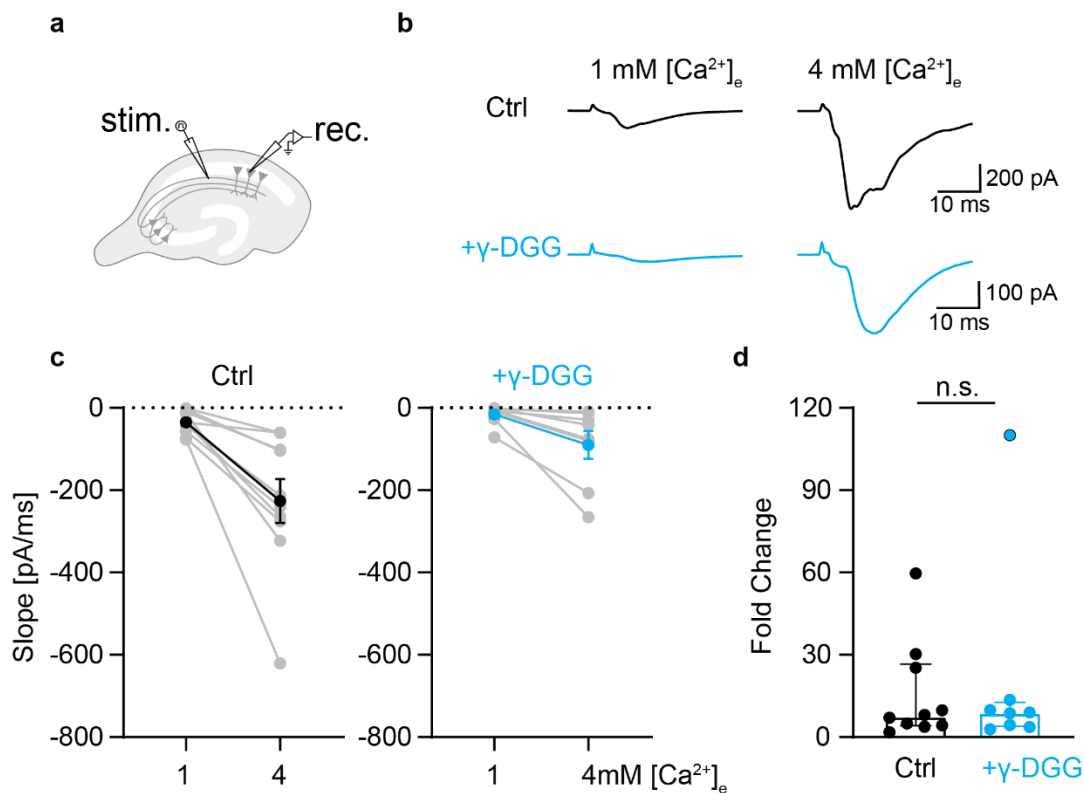

**Supplementary Figure 5: Low occupancy of AMPARs.** **a)** A monopolar electrode placed in *stratum radiatum* was used to elicit postsynaptic responses measured in whole cell voltage clamp from a CA1 neuron located  $\sim 300 \mu\text{m}$  away. To isolate AMPARs, the NMDAR blocker CPPene ( $10 \mu\text{M}$ ) was added to the bath. **b)** Example traces of AMPARs responses measured in response to electrical field stimulation in control condition (upper traces) and in the presence of  $10 \text{ mM } \gamma\text{-DGG}$ , a competitive AMPARs antagonist (lower traces) which led to decreased evoked EPSCs. **c)** (Left panel) Slope measurements of evoked EPSCs in control condition in  $1 \text{ mM } [Ca^{2+}]_e$ :  $-35.1 \pm 8.8 \text{ pA/ms}$  and in  $4 \text{ mM } [Ca^{2+}]_e$ :  $-226.5 \pm 53.2 \text{ pA/ms}$ ,  $n = 10$  cells. (Right panel) Slope measurements upon application of  $\gamma\text{-DGG}$  in  $1 \text{ mM } [Ca^{2+}]_e$ :  $-15.5 \pm 8.5 \text{ pA/ms}$  and in  $4 \text{ mM } [Ca^{2+}]_e$ :  $-90.1 \pm 33.7 \text{ pA/ms}$ ,  $n = 8$  cells. Values are plotted as mean  $\pm$  SEM. **d)** Decrease of AMPARs occupancy did not lead to a significant increase in postsynaptic fold change from low to high  $[Ca^{2+}]_e$ . There is no significant fold change from  $1 \text{ mM}$  to  $4 \text{ mM } [Ca^{2+}]_e$  in the absence (median: 7.57-fold, IQR: 4.1–26.5-fold,  $n = 10$  cells) or presence of  $\gamma\text{-DGG}$  (median: 8.84-fold, IQR: 3.8–12.6-fold,  $n = 8$  cells) (two-sided Mann Whitney test,  $p = 0.97$ ). Values are plotted as median with IQR. Source data are provided as a Source Data file.

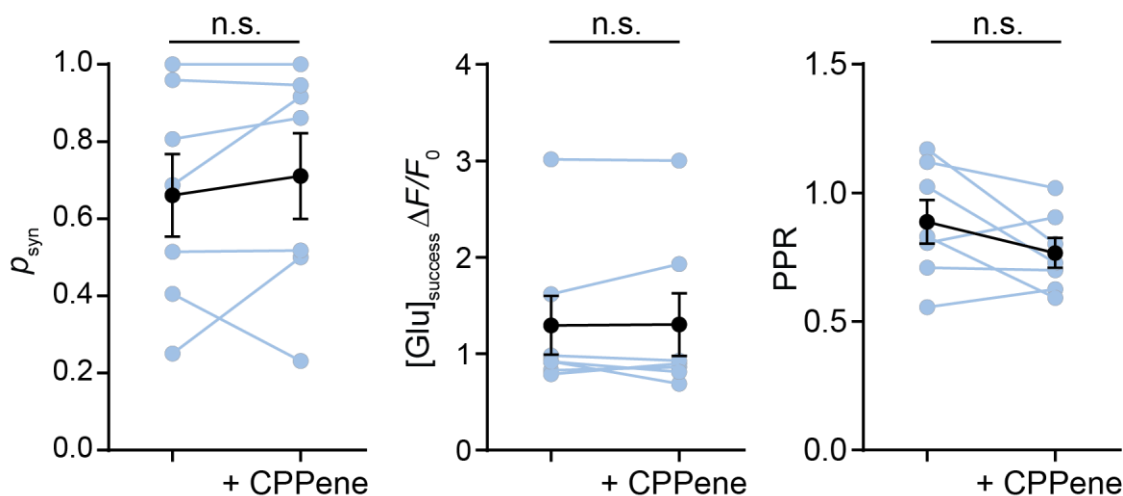

**Supplementary Figure 6: Unchanged synaptic release probability upon block of NMDAR.**

iGluSnFR changes in fluorescence (single bouton, ~30 consecutive trials) were measured in response to single action potentials before and after the application of the NMDARs blocker CPPene (10  $\mu\text{M}$ ). There was no significant difference under NMDARs block in synaptic release probability, Ctrl:  $0.66 \pm 0.1$ , NMDAR block:  $0.71 \pm 0.1$ , paired t-test,  $p = 0.41$ ; cleft glutamate, Ctrl:  $1.3 \pm 0.3 \Delta F/F_0$ , NMDAR block:  $1.3 \pm 0.3 \Delta F/F_0$ , two-sided Wilcoxon test,  $p = 0.94$ ; and PPR, Ctrl:  $89\% \pm 9\%$ , NMDAR block:  $77\% \pm 6\%$ , paired t-test,  $p = 0.13$ ;  $n = 7$  boutons in 7 slices. Values are plotted as mean  $\pm$  SEM. Source data are provided as a Source Data file.

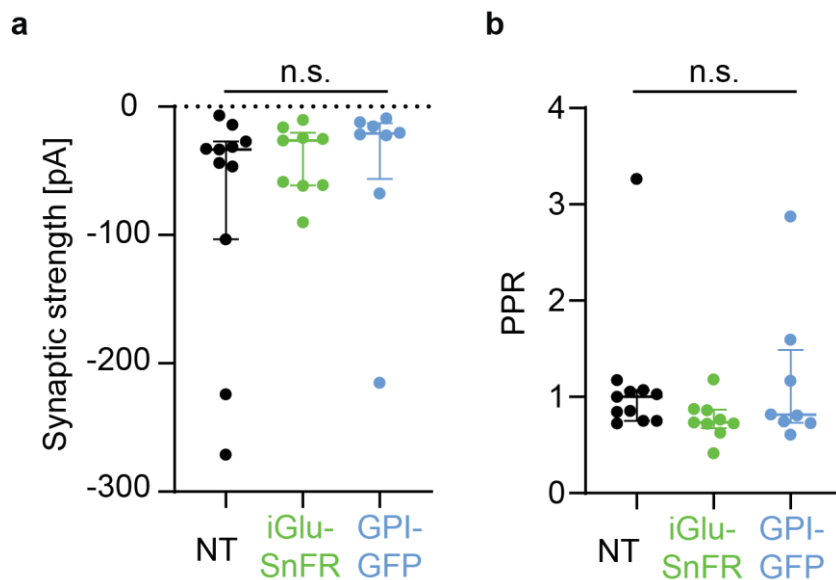

**Supplementary Figure 7: Expression of iGluSnFR does not affect synaptic transmission. a)**

EPSCs were measured by dual patch-clamp recordings from connected CA3-CA1 pyramidal cell pairs in 4 mM  $[Ca^{2+}]_e$ . The NMDA blocker CPPene (10  $\mu$ M) was added to the bath to isolate AMPAR responses. EPSCs were recorded from non-transfected (NT) CA3-CA1 pairs (median synaptic strength: -33.4 pA, IQR: -103.3 – -27.2 pA,  $n = 11$  pairs); iGluSnFR-expressing CA3-CA1 pairs (median synaptic strength: -26.4 pA, IQR: -61.4 – -20.25 pA,  $n = 9$  pairs); GPI-GFP-expressing CA3-CA1 pairs (median synaptic strength: -21.0 pA, IQR: -56.2 – -12.9 pA,  $n = 8$  pairs). There was no significant difference in measured synaptic strength between the different groups of connected CA3-CA1 pairs (Kruskal-Wallis test,  $p = 0.31$ ). **b)** EPSCs showed paired-pulse depression (ISI = 48 ms) in 4 mM  $[Ca^{2+}]_e$  for NT CA3-CA1 pairs (median PPR: 100%, IQR: 75% – 107%,  $n = 11$  pairs), for the iGluSnFR expressing CA3-CA1 (median PPR: 74%, IQR: 68% – 87%,  $n = 9$  pairs) and for the GPI-GFP CA3 expressing-CA1 pairs (median PPR: 81%, IQR: 73%– 149%,  $n = 8$  pairs). There was no significant difference in measured synaptic strength between the different groups of connected CA3-CA1 pairs (Kruskal-Wallis test,  $p = 0.17$ ). Values are plotted as median with IQR. Source data are provided as a Source Data file.

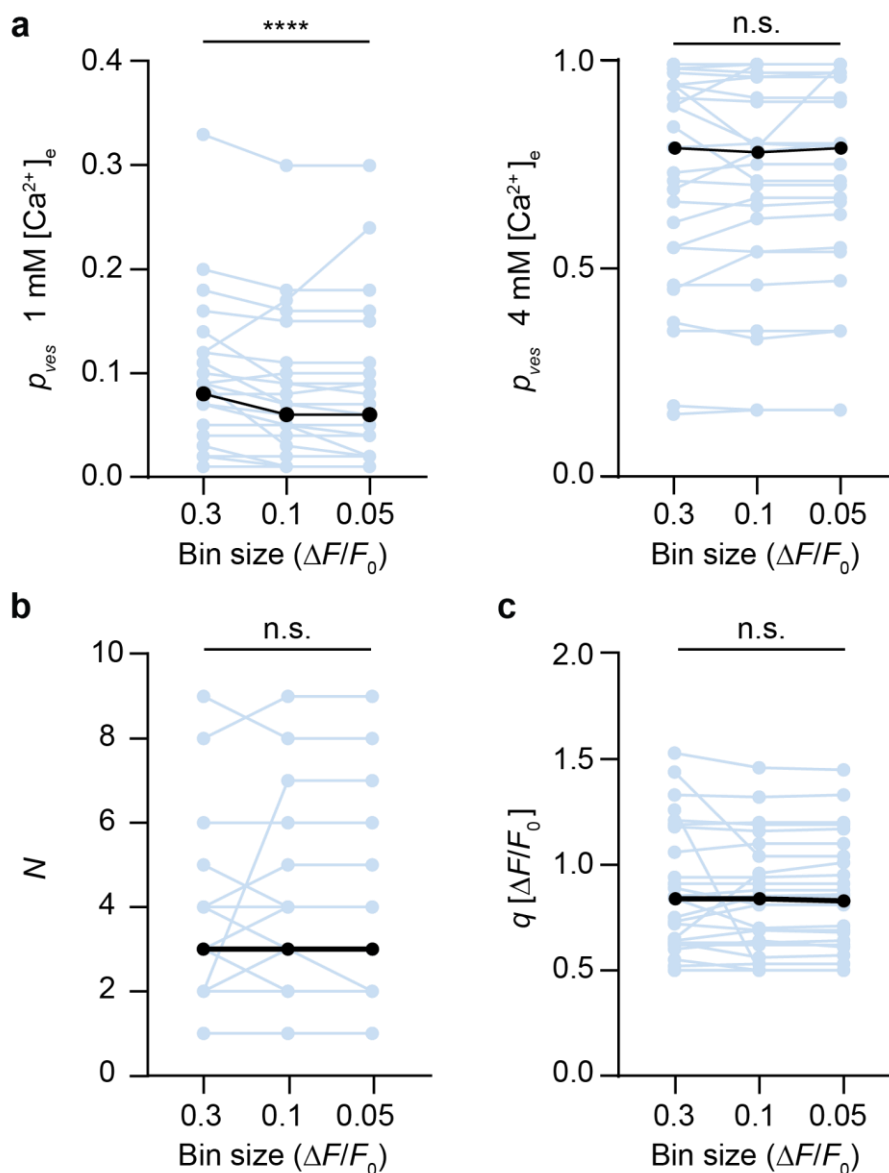

**Supplementary Figure 8: Quantal analysis by fitting binomial distributions to histograms is robust with respect to histogram bin size.**

**a)**  $p_{ves}$  in 1 mM  $[Ca^{2+}]_e$  (left) and 4 mM  $[Ca^{2+}]_e$  (right) extracted by binomial fitting of response amplitude histograms for different bin sizes. Median  $p_{ves}$  in 1 mM  $[Ca^{2+}]_e$  was different for bin size 0.3  $\Delta F/F_0$ , median: 0.08, IQR: 0.04-0.12, bin size 0.1  $\Delta F/F_0$ , median: 0.06, IQR: 0.03 - 0.1 and bin size 0.05  $\Delta F/F_0$ , median: 0.06, IQR: 0.02-0.1 (Friedman test,  $p < 0.0001$   $n = 27$  boutons), but the size of the effect was small.  $p_{ves}$  in 4 mM  $[Ca^{2+}]_e$  did not depend on bin size (one-way ANOVA,  $p = 0.48$ ,  $n = 27$  boutons). **b)** Number of vesicles  $N$  extracted by binomial fitting did not depend on bin size (Friedman test,  $p = 0.97$ ,  $n = 27$  boutons). **c)** Quantal size  $q$  extracted by binomial fitting did not depend on bin size (one-way ANOVA,  $p = 0.33$ ,  $n = 27$  boutons). Median values are plotted in black and individual datapoints in blue. Source data are provided as a Source Data file.



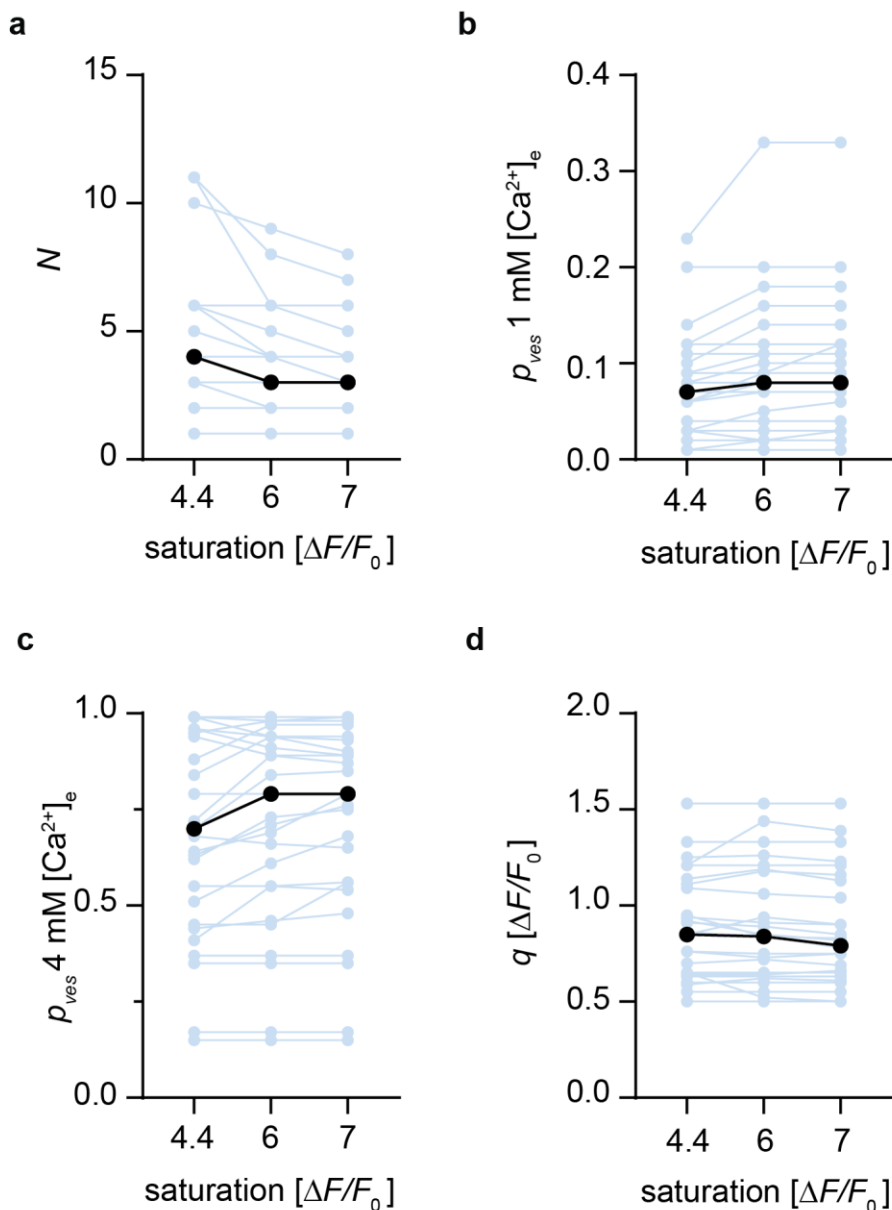

**Supplementary Figure 9: Extracted parameters are robust to the assumed saturation value.**

Extracted number of **a)** vesicles **b)** vesicular release probability in 1 mM  $[Ca^{2+}]_e$  **c)** vesicular release probability in 4 mM  $[Ca^{2+}]_e$  and **d)** quantal size from the binomial fitting procedure of individual boutons assuming different saturation values of iGluSnFR-expressing boutons ( $n = 27$  boutons). Median values are plotted in black. Our Monte-Carlo simulations (Fig. 5f) suggest apparent saturation at 6  $\Delta F/F_0$  for a synapse at optimal orientation and 7  $\Delta F/F_0$  for a 40° tilted synapse. Assuming saturation at 4.4  $\Delta F/F_0$ , which is the literature value of iGluSnFR when calibrated with glutamate-containing solutions, requires one more vesicle (on average) to fit the shape of the response histograms. Source data are provided as a Source Data file.

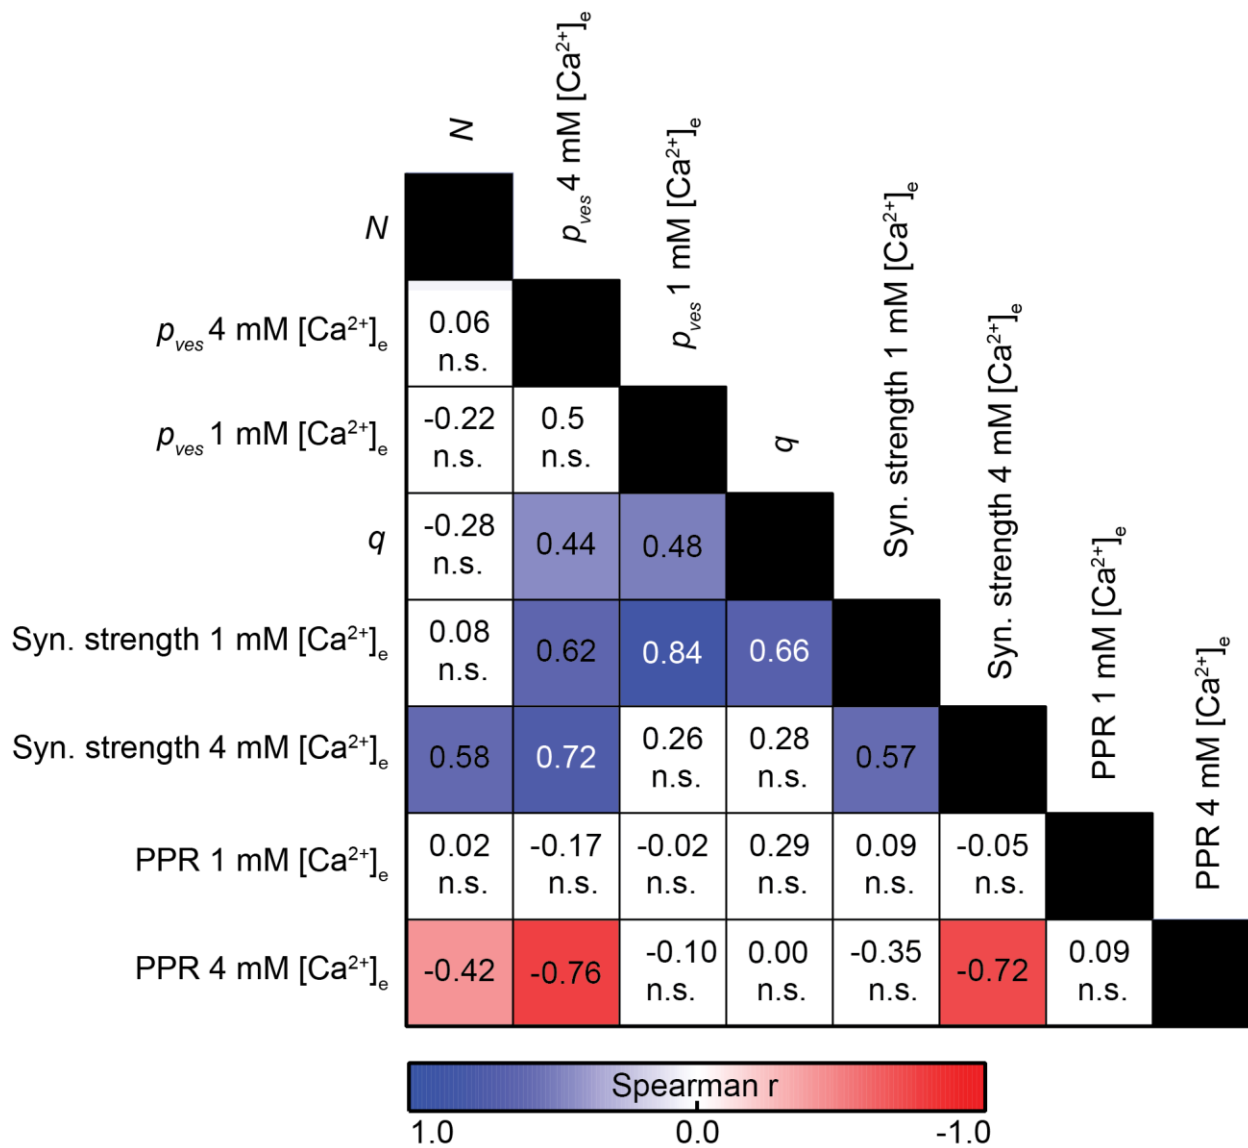

**Supplementary Figure 10: Correlation matrix of extracted quantal parameters, synaptic strength ( $\rho^*q^*N$ ) and paired-pulse ratio (PPR).** Significant positive correlations are labeled in blue, significant negative correlations in red. Source data are provided as a Source Data file.

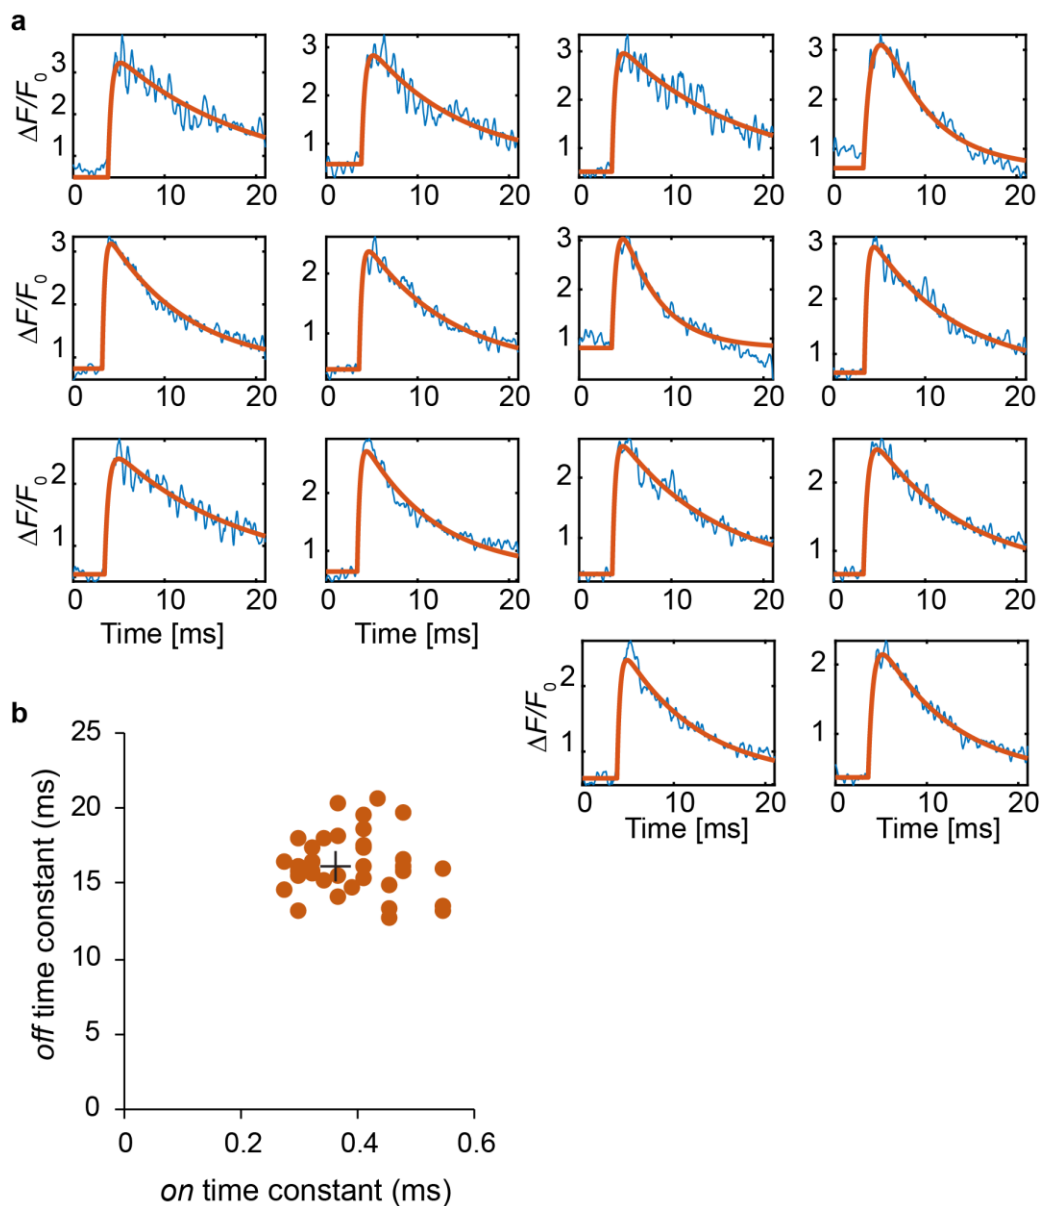

**Supplementary Figure 11: Extracting iGluSnFR kinetics from synaptic imaging data.**

**a)** Example traces of point scan (64 kHz sampling) of iGluSnFR signal in response to a single action potential. Blue lines: 14 success trials from 1 bouton. Red lines: double exponential fits.

**b)** Extracted time constants from  $n = 36$  fits to traces from 3 boutons. Black cross: median  $\tau_{on}$  (0.36 ms), median  $\tau_{off}$  (16.1 ms). Reaction rates for the MCell model were based on these measurements (see Methods). Source data are provided as a Source Data file.
